# Supplementary material for: Improving Eating Habits at the Office: An Umbrella Review of Nutritional Interventions
Source: MDPI journal article supplement (doi:10.3390/nu15245072), 2023-12-12
Supplement: s1 [file s1]

First Author:

Corresponding author and email:

Publication title:

Journal:

Volume (issue):

Pages:

DOI:

-----  
-----

**1. Type of secondary study:**

- Systematic review
- Systematic review and meta-analysis
- Other

**2. Research question in the review according to PICOS:**

|                                                                                                                                                                                                                |
|----------------------------------------------------------------------------------------------------------------------------------------------------------------------------------------------------------------|
| P (population):                                                                                                                                                                                                |
| I (intervention):                                                                                                                                                                                              |
| C (comparison):                                                                                                                                                                                                |
| O (outcome):                                                                                                                                                                                                   |
| S (study type): <ul style="list-style-type: none"><li>• RCT</li><li>• pseudo-experiment</li><li>• observational (cohort or case-control study)</li><li>• cross-sectional study</li><li>• descriptive</li></ul> |

**3. How many studies were included in the review?:**

**4. How many participants there were in all primary studies included in the review (if listed)?**

**5. How was the quality of the primary studies included in the review assessed (name of the control list)?**

**6. What are the conclusions of the review (in meta-analysis effect size [OR, RR, MD] and confidence interval [95%CI] should be given)?**

**7. Decision on including the review into the umbrella review:**

- include
- exclude (giving reason for exclusion)
