# Supplementary material for: Improving Eating Habits at the Office: An Umbrella Review of Nutritional Interventions
Source: MDPI journal article supplement (doi:10.3390/nu15245072), 2023-12-12
Supplement: s1 [file s1]

| First author (year)      | 1 | 2          | 3 | 4          | 5 | 6 | 7          | 8   | 9          | 9a           | 10 | 11         | 12  | 13 | 14 | 15         | 16 | Overall result |
|--------------------------|---|------------|---|------------|---|---|------------|-----|------------|--------------|----|------------|-----|----|----|------------|----|----------------|
| Allan (2017)             | y | <b>p y</b> | n | <b>p y</b> | y | y | <b>p y</b> | y   | y          | <b>p y</b>   | n  | <b>n m</b> | n m | y  | n  | <b>n m</b> | y  | low            |
| Anderson (2009)          | y | <b>p y</b> | n | <b>p y</b> | y | y | <b>p y</b> | p y | <b>p y</b> | <b>p y</b>   | n  | y          | y   | y  | y  | y          | y  | moderate       |
| Brown (2018)             | y | <b>p y</b> | n | <b>p y</b> | y | y | <b>p y</b> | y   | <b>p y</b> | <b>p y</b>   | n  | <b>n m</b> | n m | y  | n  | <b>n m</b> | y  | low            |
| Cabrera (2021)           | y | <b>p y</b> | n | <b>p y</b> | y | y | <b>p y</b> | p y | <b>n</b>   | <b>n</b>     | n  | y          | y   | y  | y  | y          | y  | low            |
| Fitzpatrick-Lewis (2022) | y | <b>p y</b> | n | <b>p y</b> | y | y | <b>p y</b> | y   | <b>p y</b> | <b>p y</b>   | n  | <b>n</b>   | y   | y  | n  | <b>n</b>   | y  | low            |
| Geaney (2013)            | n | <b>p y</b> | y | <b>p y</b> | y | y | <b>p y</b> | p y | <b>p y</b> | <b>p y</b>   | n  | <b>n m</b> | n m | y  | n  | <b>n m</b> | y  | low            |
| Ghobadi (2022)           | y | <b>p y</b> | n | <b>p y</b> | y | y | <b>n</b>   | y   | <b>p y</b> | <b>o rct</b> | n  | <b>n m</b> | n m | y  | n  | <b>n m</b> | y  | low            |
| Groeneveld (2010)        | y | <b>p y</b> | y | <b>p y</b> | y | y | <b>p y</b> | p y | <b>p y</b> | <b>p y</b>   | n  | <b>n m</b> | n m | y  | n  | <b>n m</b> | n  | low            |
| Gudzune (2013)           | n | <b>p y</b> | n | <b>p y</b> | y | y | <b>p y</b> | n   | <b>p y</b> | <b>p y</b>   | n  | <b>n m</b> | n m | y  | n  | <b>n m</b> | y  | low            |
| Hendren (2017)           | n | <b>p y</b> | n | <b>p y</b> | n | n | <b>n</b>   | p y | <b>p y</b> | <b>p y</b>   | n  | <b>n m</b> | n m | y  | n  | <b>n m</b> | y  | low            |
| Lee (2022)               | y | <b>p y</b> | n | <b>p y</b> | y | y | <b>p y</b> | p y | <b>p y</b> | <b>o rct</b> | n  | <b>n m</b> | n m | y  | n  | <b>n m</b> | y  | low            |
| Madden (2020)            | y | <b>p y</b> | n | <b>p y</b> | y | y | <b>y</b>   | p y | <b>p y</b> | <b>p y</b>   | n  | <b>n m</b> | n m | y  | y  | <b>n m</b> | n  | low            |
| Ni Mhurchu (2010)        | n | <b>p y</b> | n | <b>p y</b> | n | n | <b>n</b>   | n   | <b>p y</b> | <b>p y</b>   | n  | <b>n m</b> | n m | y  | n  | <b>n m</b> | y  | low            |
| Park (2019)              | y | <b>p y</b> | n | <b>p y</b> | y | y | <b>p y</b> | p y | <b>p y</b> | <b>o rct</b> | n  | y          | y   | y  | y  | y          | y  | low            |
| Sandercock (2018)        | n | <b>p y</b> | n | <b>p y</b> | y | y | <b>p y</b> | n   | <b>p y</b> | <b>p y</b>   | y  | <b>n m</b> | n m | y  | n  | <b>n m</b> | y  | low            |
| Sawada (2019)            | y | <b>p y</b> | n | <b>p y</b> | y | y | <b>p y</b> | p y | <b>p y</b> | <b>o rct</b> | n  | <b>n m</b> | n m | y  | n  | <b>n m</b> | y  | low            |

y – yes; n – no; p y – partial yes; n m – no meta-analysis conducted; o rct – includes only RCTs

bold – critical domain
